# Supplementary material for: Insulin-like growth factor 1 associated with altered immune responses in preterm infants and pigs
Source: PubMed Central journal article supplement (PMC10798898; doi:10.1038/s41390-023-02794-w), 2023-08-30
Supplement: 41390_2023_2794_MOESM1_ESM.pdf [file 41390_2023_2794_MOESM1_ESM.pdf]

**Supplementary Table S1: List of primer sequences used and genes investigated.**

| <b>Gene</b>   | <b>Protein</b>                                     | <b>Forward sequence (5'-3')</b> | <b>Reverse sequence (5'-3')</b> | <b>Amplicon length*</b> |
|---------------|----------------------------------------------------|---------------------------------|---------------------------------|-------------------------|
| <i>HPRT1</i>  | Hypoxanthine Phosphoribosyl Transferase 1          | TATGGACAGGACTGAACGGC            | ACACAGAGGGCTACGATGTG            | 75                      |
| <i>CPT1A</i>  | Carnitine Palmitoyl Transferase 1A                 | AAGATGGGCATGAACGCTGA            | GTGGCCGTCCTCCTCATAAC            | 114                     |
| <i>CXCL9</i>  | CXC chemokine ligand 9                             | GAAAAGCAGTGTTGCCTTGCT           | TGATGCAGGAACAACGTCCAT           | 98                      |
| <i>CXCL10</i> | CXC chemokine ligand 10                            | ATCATCCCGAGCTGTTGAGC            | CCAGGACTTGGCACATTAC             | 94                      |
| <i>GATA3</i>  | GATA binding protein 3                             | ACCCCTTATTAAGCCCAAGC            | TCCAGAGAGTCGTCGTTGTG            | 92                      |
| <i>HIF1A</i>  | Hypoxia-inducible factor 1 alpha                   | TGTGTTATCTGTCGCTTTGAGTC         | TTTCGCTTTCTCTGAGCATTC           | 96                      |
| <i>HK1</i>    | Hexokinase 1                                       | TTTCCCTTGTCGGCAATCCA            | CCTCCACTCCGCTTGCTTTA            | 80                      |
| <i>IFNG</i>   | Interferon gamma                                   | AGCTTTGCGTGACTTTGTGT            | ATGCTCCTTTGAATGGCCTG            | 247                     |
| <i>IL2</i>    | Interleukin 2                                      | AAGCTCTGGAGGGAGTGCTA            | CAACAGCAGTTACTGTCTCATCA         | 159                     |
| <i>IL4</i>    | Interleukin 4                                      | GTACCAGCAACTTCGTCCAC            | CCTTCTCCGTCGTGTTCTCT            | 150                     |
| <i>IL6</i>    | Interleukin 6                                      | TGCCACCTCAGACAAAATGC            | AGGTTTCAGGTTGTTTTCTGCC          | 159                     |
| <i>IL10</i>   | Interleukin 10                                     | GTCCGACTCAACGAAGAAGG            | GCCAGGAAGATCAGGCAATA            | 73                      |
| <i>IL17</i>   | Interleukin 17                                     | GCACACGGGCTGCATCAACG            | TGCAACCAACAGTGACCCGCA           | 149                     |
| <i>IGF1</i>   | Insulin-like growth factor 1                       | ATTTCTTGAAGGTAAAGATGCA          | CAGCCCCACAGAGGGTCTCA            | 117                     |
| <i>PDHA1</i>  | Pyruvate dehydrogenase $\alpha$ 1                  | GTCAGGAAGCTTGTTGCGTG            | GGTAAAGCCATGAGCTCGGT            | 86                      |
| <i>PKM</i>    | Pyruvate kinase M1/2                               | GCCCTGGACTACTAAAGGACC           | CAGCCACAGGACATTCTCGT            | 147                     |
| <i>PPARG</i>  | Peroxisome proliferator activated receptor gamma   | TGACCATGGTTGACACCGAG            | GATCAGCTCTCGGGAATGGG            | 128                     |
| <i>RORC</i>   | Retinoic acid-related orphan receptor              | CAGCGCTCCAACATCTTCTC            | GACCAGCACCCTTCCATTG             | 207                     |
| <i>STAT3</i>  | Signal Transducer and Activator of Transcription 3 | ACATCCTTGTGTCTCCGCTG            | GTATGGGGCAGCACTACCTG            | 125                     |
| <i>T-bet</i>  | T-Box transcription factor                         | CTGAGAGTCGCGCTCAACAA            | ACCCGGCCACAGTAAATGAC            | 121                     |
| <i>TGFB1</i>  | Transforming growth factor beta 1                  | GCAAGGTCCTGGCTCTGTA             | TAGTACACGATGGGCAGTGG            | 97                      |
| <i>TLR2</i>   | Toll-like receptor 2                               | CGTGTGCTATGACGCTTTCG            | GTACTTGCACCACTCGCTCT            | 232                     |
| <i>TLR4</i>   | Toll-like receptor 4                               | TGGTGTCCCAGCACTTCATA            | CAACTTCTGCAGGACGATGA            | 116                     |
| <i>TNFA</i>   | Tumor necrosis factor alpha                        | ATTCAGGGATGTGTGGCCTG            | CCAGATGTCCCAGGTTGCAT            | 120                     |

\*: Length in base pairs

**Supplementary Table S2: Hematological parameters in preterm pigs supplemented with IGF-1**

|                                                  | <b>Day</b> | <b>Placebo</b> | <b>IGF-1</b> | <b>P</b> |
|--------------------------------------------------|------------|----------------|--------------|----------|
| Lymphocyte fraction<br>(% of leucocytes)         | 8          | 33.1 (3.1)     | 30.9 (3.7)   | NS       |
|                                                  | 19         | 41.5 (4.0)     | 41.8 (3.0)   | NS       |
| Monocytes fraction<br>(% of leucocytes)          | 8          | 1.2 (0.2)      | 1.6 (0.4)    | NS       |
|                                                  | 19         | 2.8 (0.3)      | 2.4 (0.3)    | NS       |
| Neutrophil fraction<br>(% of leucocytes)         | 8          | 63.9 (3.0)     | 62.7 (3.2)   | NS       |
|                                                  | 19         | 51.9 (4.1)     | 51.8 (2.6)   | NS       |
| Banded neutrophils (10 <sup>9</sup> cells/L)     | 8          | 0.075 (0.05)   | 0.133 (0.07) | NS       |
|                                                  | 19         | 0.100 (0.07)   | 0.328 (0.31) | NS       |
| Banded neutrophil fraction<br>(% of neutrophils) | 8          | 1.2 (0.6)      | 3.9 (2.0)    | NS       |
|                                                  | 19         | 1.3 (0.8)      | 5.7 (5.4)    | NS       |
| Basophils (10 <sup>9</sup> cells/L)              | 8          | 0.1 (0.0)      | 0.2 (0.1)    | NS       |
|                                                  | 19         | 0.4 (0.2)      | 0.3 (0.1)    | NS       |
| Basophils fraction<br>(% of leucocytes)          | 8          | 0.1 (0.0)      | 0.2 (0.1)    | NS       |
|                                                  | 19         | 0.4 (0.2)      | 0.3 (0.1)    | NS       |
| Eosinophils (10 <sup>9</sup> cells/L)            | 8          | 0.03 (0.01)    | 0.02 (0.0)   | NS       |
|                                                  | 19         | 41.5 (4.0)     | 41.8 (3.0)   | NS       |
| Eosinophils fraction<br>(% of leucocytes)        | 8          | 0.4 (0.1)      | 0.4 (0.1)    | NS       |
|                                                  | 19         | 1.1 (0.3)      | 0.8 (0.2)    | NS       |
| Platelets (10 <sup>9</sup> cells/L)              | 8          | 427 (80)       | 363 (37)     | NS       |
|                                                  | 19         | 609 (86)       | 714 (73)     | NS       |

Data are shown as means with corresponding standard errors. NS: Not significant
